# Supplementary material for: Molecular Evolution, Diversity, and Adaptation of Influenza A(H7N9) Viruses in China
Source: Emerg Infect Dis. 2018 Oct;24(10):1795–805. doi: 10.3201/eid2410.171063 (PMC6154164; doi:10.3201/eid2410.171063)
Supplement: Technical Appendix — Additional information on molecular evolution, diversity, and adaptation of influenza A(H7N9) viruses in China. [file 17-1063-Techapp-s1.pdf]

# Molecular Evolution, Diversity, and Adaptation of Influenza A(H7N9) Viruses in China

## Technical Appendix

### Materials and Methods

#### Collection of Environmental Samples

As described (1–3), the Guangdong Provincial Center for Disease Control and Prevention launched an environmental surveillance program to monitor avian influenza viruses in live-poultry markets (LPMs) in 21 prefecture cities in April 2013. For each city,  $\geq 1$  local LPM was selected on the basis of their poultry sales and market coverage. A total of 625 LPMs were included in the environment surveillance study.

Because of seasonality in the prevalence of avian influenza, surveillance of LPMs was performed during November–May in 11 cities and each month in 10 other cities. At least 20 environmental samples were collected per market each week during the surveillance period. Environmental samples were collected as wet swab specimens from poultry feces, chicken epilator surfaces, chopping board surfaces, case surfaces, and sewage (3). If infection of a person with influenza A(H7N9) virus was confirmed and the person had exposure to an LPM,  $>20$  environmental samples were collected from that market. The method of sample collection and detection used in this study has been described (2).

Serum samples were collected from 4 patients infected with influenza A(H7N9) virus: 2 (patients P1 and P2) in 2015 and 2 (patients P3 and P4) in 2017 (Table). Respiratory specimens were collected for reverse transcription PCR and blindly passaged for 2–3 generations in embryonated chicken eggs for virus isolation. Serum samples were collected 2–3 weeks after clinical symptoms were observed and were aliquoted and stored at  $-70^{\circ}\text{C}$ . H7N9 subtype virus strains (EPI1171790/A/ZS29 and EPI1171792/A/ST18) were isolated from respiratory specimens of P3 and P4 (Table).

Assays were performed according to the laboratory procedure defined by the World Health Organization (

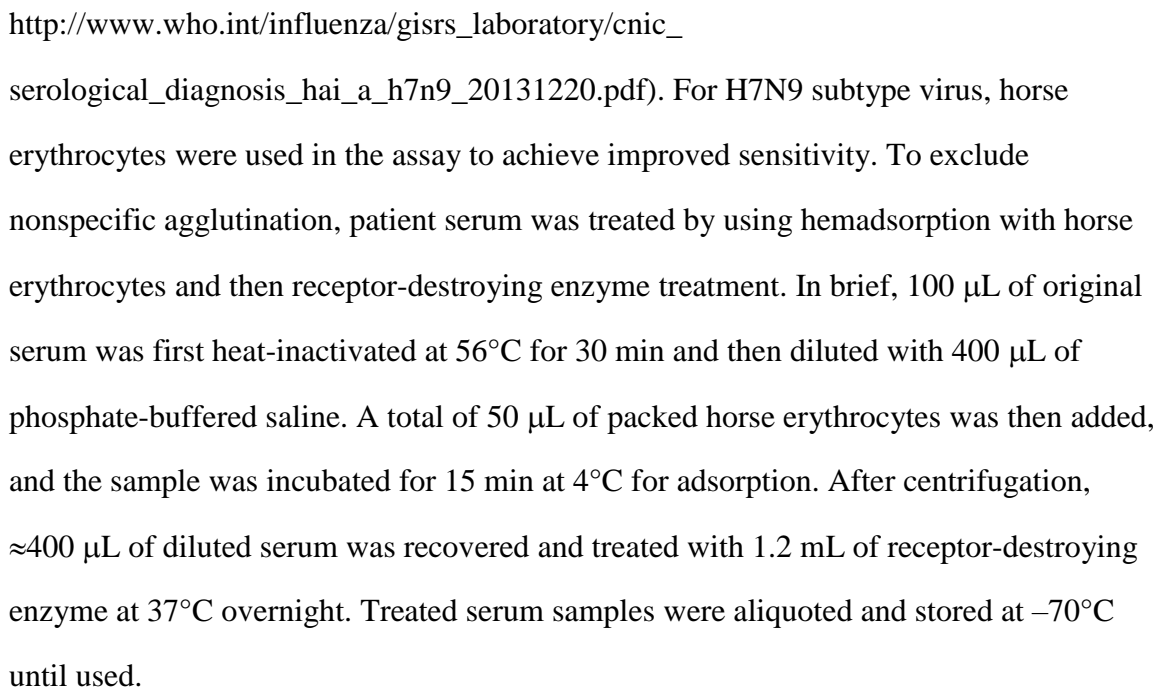

Hemagglutinin titers for influenza A(H7N9) virus reference strains from each clade (Table) were first determined by using hemagglutination testing. Samples were then diluted to make a working solution containing 8 hemagglutinating units/50  $\mu$ L. Two-fold serial dilutions of treated serum samples (25  $\mu$ L) were subsequently prepared and mixed with 25  $\mu$ L of standardized virus containing 4 hemagglutinating units. Mixtures were incubated for 30 min at room temperature before hemagglutination testing. Virus back titration was performed in parallel. Each experiment was repeated twice, and HI titers (Table) shows mean values from the 2 experiments.

## References

1. Lu J, Wu J, Zeng X, Guan D, Zou L, Yi L, et al. Continuing reassortment leads to the genetic diversity of influenza virus H7N9 in Guangdong, China. *J Virol*. 2014;88:8297–306. [PubMed http://dx.doi.org/10.1128/JVI.00630-14](http://dx.doi.org/10.1128/JVI.00630-14)
2. Ke C, Lu J, Wu J, Guan D, Zou L, Song T, et al. Circulation of reassortant influenza A(H7N9) viruses in poultry and humans, Guangdong Province, China, 2013. *Emerg Infect Dis*. 2014;20:2034–40. [PubMed http://dx.doi.org/10.3201/eid2012.140765](http://dx.doi.org/10.3201/eid2012.140765)
3. Kang M, He J, Song T, Rutherford S, Wu J, Lin J, et al. Environmental sampling for avian influenza A(H7N9) in live-poultry markets in Guangdong, China. *PLoS One*. 2015;10:e0126335. [PubMed http://dx.doi.org/10.1371/journal.pone.0126335](http://dx.doi.org/10.1371/journal.pone.0126335)
4. Gouet P, Courcelle E, Stuart DI, Métoz F. ESPript: analysis of multiple sequence alignments in PostScript. *Bioinformatics*. 1999;15:305–8. [PubMed http://dx.doi.org/10.1093/bioinformatics/15.4.305](http://dx.doi.org/10.1093/bioinformatics/15.4.305)
5. Winn MD, Ballard CC, Cowtan KD, Dodson EJ, Emsley P, Evans PR, et al. Overview of the CCP4 suite and current developments. *Acta Crystallogr D Biol Crystallogr*. 2011;67:235–42. [PubMed http://dx.doi.org/10.1107/S0907444910045749](http://dx.doi.org/10.1107/S0907444910045749)

6. Wiley DC, Wilson IA, Skehel JJ. Structural identification of the antibody-binding sites of Hong Kong influenza haemagglutinin and their involvement in antigenic variation.

Nature. 1981;289:373–8. [PubMed http://dx.doi.org/10.1038/289373a0](http://dx.doi.org/10.1038/289373a0)

**Technical Appendix Table 1.** Geographic distribution of human case of infection with influenza A(H7N9) virus (as of April 8, 2017) and HA and NA gene sequences used in phylogenetic analyses, China\*

| Location in China | No. clinical cases | No. HA sequences | No. NA sequences |
|-------------------|--------------------|------------------|------------------|
| Eastern           | 709                | 271              | 210              |
| Central           | 134                | 66               | 77               |
| Northern          | 47                 | 12               | 15               |
| Southeastern      | 105                | 26               | 31               |
| Central Guangdong | 211                | 296              | 219              |
| Eastern Guangdong | 61                 | 66               | 58               |

\*HA, hemagglutinin; NA, neuraminidase.

**Technical Appendix Table 2.** Amino acid substitutions (H3 numbering) identified on trunk branches of H7 gene of influenza A(H7N9) viruses, China\*

| Mutation   | Associated lineage | Solvent accessibility† | Salient feature           |
|------------|--------------------|------------------------|---------------------------|
| <b>HA1</b> |                    |                        |                           |
| A1V        | B                  | Unknown                | NA                        |
| N6D        | B                  | Unknown                | NA                        |
| I48T       | C2                 | Partial                | NA                        |
| K57R       | B                  | Full                   | NA                        |
| E114K      | B                  | Partial                | NA                        |
| A122P/T    | <b>C1, C2</b>      | Full                   | NA                        |
| S128N      | C                  | Full                   | Within 130 loop           |
| A135V      | B, C               | Full                   | Receptor binding residue‡ |
| R140K      | C1                 | Full                   | Antigenic site A§         |
| K173E      | C2                 | Full                   | Antigenic site E§         |
| L177I      | B, C               | Inaccessible           | Antigenic site E§         |
| L226Q      | C2                 | Partial                | Receptor binding residue‡ |
| M236I      | <b>C1, C2</b>      | Partial                | NA                        |
| N276D      | B                  | Full                   | Antigenic site C§         |
| I326V      | C2                 | Unknown                | Proteolytic cleavage site |
| <b>HA2</b> |                    |                        |                           |
| E386A      | C                  | Full                   | NA                        |
| E393K      | C2                 | Partial                | NA                        |
| V429I      | C1                 | Inaccessible           | NA                        |
| D476N      | B                  | Full                   | NA                        |
| S489R/N    | B, C               | Full                   | NA                        |

\*Independent mutations on two or more lineages are highlighted in bold. HA, hemagglutinin; NA, not applicable.

†As defined by analysis with ESPript (4) using the biologic assembly of PDB: 4BSE.

‡Receptor-binding residues were determined by using CONTACT in CCP4 (5).

§Antigenic sites as defined by Wiley et al. (6).

**Technical Appendix Table 3.** Amino acid substitutions (N2 numbering) on trunk branches of the N9 gene of avian influenza A(H7N9) viruses, China\*

| Mutation | Associated Lineage |
|----------|--------------------|
| I16T     | <b>B, C1, C2</b>   |
| G18S     | B                  |
| A21T     | C2                 |
| V22A     | B                  |
| H55R     | C2                 |
| T60I     | B                  |
| M82I     | C1                 |
| S45P     | C1                 |
| T181A    | C1                 |
| V205I    | C2                 |
| V212I    | C1                 |
| S245P    | <b>C1, C2</b>      |
| E283K    | C2                 |
| I303V    | C1                 |
| V308I    | B                  |
| N325S    | <b>C1, C2</b>      |
| N347S    | B                  |
| V349I    | B                  |
| A358T/D  | <b>C1, C2</b>      |
| R430K    | C2                 |

\*Independent mutations for  $\geq 2$  lineages are indicated in bold.

**Technical Appendix Table 4.** Putative sites (H3 numbering) that undergo positive selection in influenza A(H7N9) virus lineages B and C (clades C1 and C2), China\*

| Lineage | Method |         |             |                        |
|---------|--------|---------|-------------|------------------------|
|         | SLAC   | FEL     | MEME        | FUBAR                  |
| B       | None   | 57, 140 | 57, 140     | 57, 140, 276, 291, 493 |
| C1      | None   | 57, 424 | 57, 424     | 57, 114, 424           |
| C2      | 226    | 226     | 3, 226, 486 | 226, 332               |

\*FEL, fixed-effects likelihood; FUBAR, fast unconstrained Bayesian approximation; MEME, mixed-effects model of evolution; SLAC, single-likelihood ancestor counting.

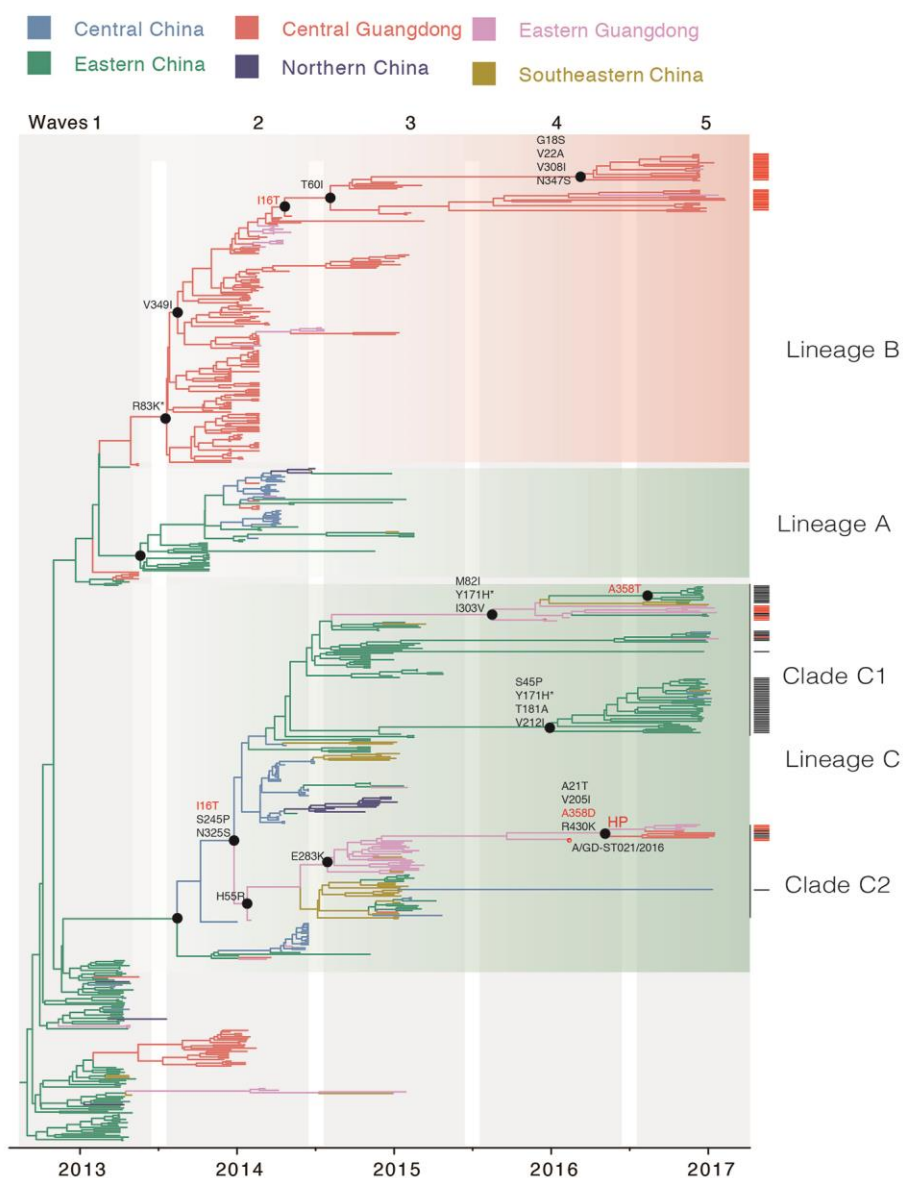

**Technical Appendix Figure 1.** Bayesian maximum clade credibility tree of neuraminidase genes from influenza A(H7N9) viruses, China. Published sequences (from waves 4 and 5) from other studies are indicated by black bars to the right of the tree, and sequences reported in this study from Guangdong are indicated by red bars. Branches are colored according to geographic locations, as in Figure 1. Amino acid changes are mapped on trunk branches of B and C lineages. Parallel changes that occur in both lineages are indicated in red. Mutations are

numbered according to the N2 scheme, with the exception of mutations marked by \*, which are not present in the N2 protein and are based on the N9 numbering scheme.

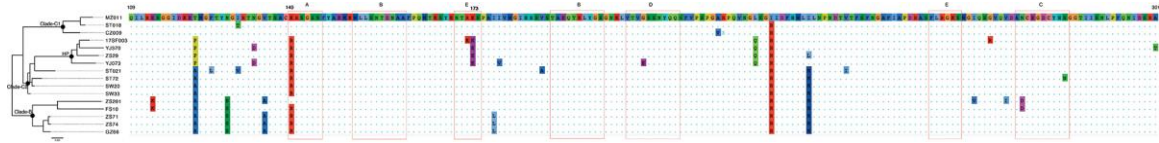

**Technical Appendix Figure 2.** Sequence alignment of hemagglutinin genes of influenza

A(H7N9) virus strains used in the hemagglutination inhibition test in Technical Appendix Table 1, China. The region (109–301, H3 numbering) determining viral antigenicity is shown, and A–E antigenic epitopes are indicated by red boxes. Different colors indicate different amino acids. Dots indicate sequence identity. Scale bar indicates amino acid substitutions per site.
